# Supplementary material
Source: Springer Nature journal article supplement (https://www.springermedizin.de/resource/supplementary/12874_2008_285_MOESM4_ESM.pdf/9434154)

Frequency

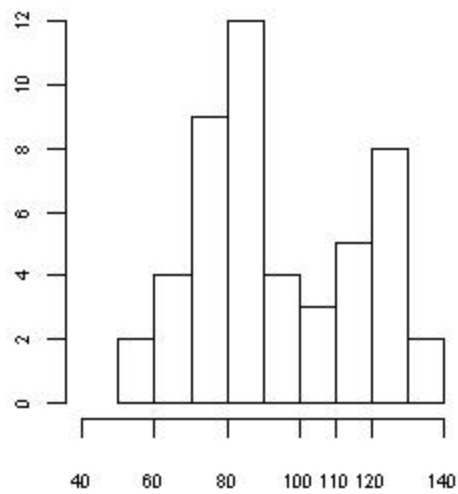

WL-HF

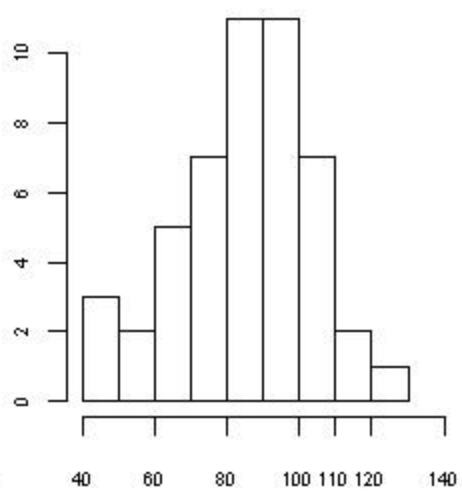

EO-HF

Supplement: MOESM4 [file 9434154]
